# Supplementary material for: Effect of polyacrylamide morphology templated using lyotropic liquid crystal on the proton conductivity of acid hydrogels
Source: Royal Society of Chemistry journal article supplement (doi:10.1039/d2sm01282k), 2022-11-24
Supplement: d2sm01282k1.pdf [file d2sm01282k1.pdf]

## Supporting Information

### **Effect of polyacrylamide morphology templated by lyotropic liquid crystal on proton conductivity of acid hydrogels**

*Jia Chen, Jie Luo, Shuai Tan, Caihong Wang, and Yong Wu\**

School of Chemical Engineering, Sichuan University

No. 24 South Section 1, Yihuan Road, Chengdu 610065, China

Corresponding Author

\* E-mail: wuyong@scu.edu.cn

## 1. SEM images of freeze-dried hydrogels in absence of EBDSA

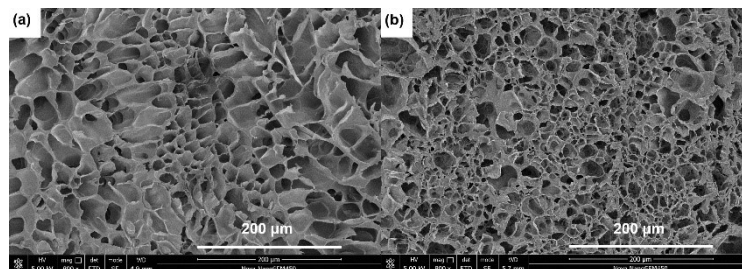

Fig. S1. SEM images of freeze-dried (a)  $G_{\text{PAM-Poly@15}^\circ\text{C}}$  and (b)  $G_{\text{PAM-Poly@45}^\circ\text{C}}$ .

$G_{\text{PAM-Poly@15}^\circ\text{C}}$  and  $G_{\text{PAM-Poly@45}^\circ\text{C}}$  were obtained polymerizing a precursor consisting of acrylamide (13 wt%), EGDMA (0.4 wt%), and HEPK (0.1 wt%) at 15 and 45 °C, respectively.

## 2. Dependence of conductivity on EBDSA concentration

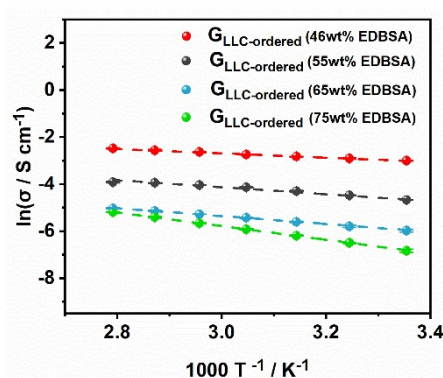

Fig. S2. Temperature-dependent proton conductivities of  $G_{\text{LLC-ordered}}$  containing 55 wt%, 65 wt% and 75 wt% EBDSA, respectively.

## 3. Effect of DBSA on conductivity of hydrogels

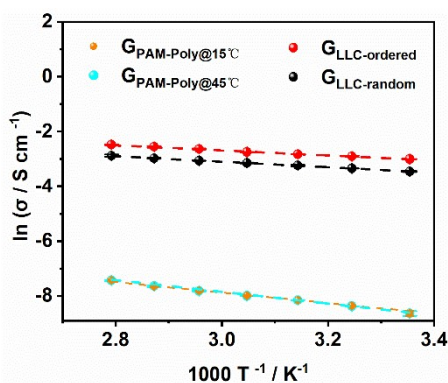

Fig. S3. Temperature dependent conductivities of  $G_{\text{PAM-Poly@15}^\circ\text{C}}$ ,  $G_{\text{PAM-Poly@45}^\circ\text{C}}$ ,  $G_{\text{LLC-ordered}}$  and  $G_{\text{LLC-random}}$ .
